# Supplementary material for: Riboflavin as a Mucosal Adjuvant for Nasal Influenza Vaccine
Source: MDPI journal article supplement (doi:10.3390/vaccines9111296), 2021-11-09
Supplement: s1 [file s1]

## Article

# Riboflavin as a Mucosal Adjuvant for Nasal Influenza Vaccine

Yinyan Yin <sup>1,†</sup>, Jinyuan Wang <sup>2,3,4,5,†</sup>, Xing Xu <sup>2,3,4,5</sup>, Bangyue Zhou <sup>1,6</sup>, Sujuan Chen <sup>2,3,4,5</sup>, Tao Qin <sup>2,3,4,5</sup>, Daxin Peng <sup>2,3,4,5,\*</sup>

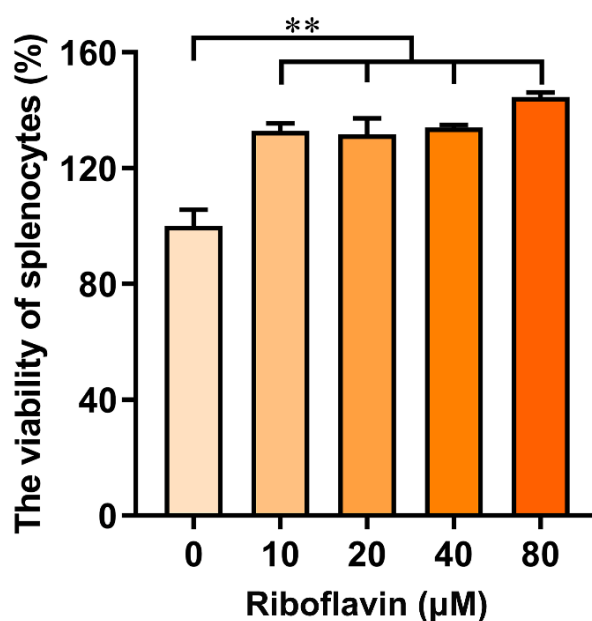

**Figure S1.** The proliferation of splenic lymphocytes by riboflavin in vitro. Lymphocytes were separated from spleens of BALB/c mice and incubated with riboflavin (10, 20, 40, and 80 μM) for 72 h, and then the proliferative level was detected by using the CCK-8 assay. Results are from one representative experiment of three performed. All of the data are presented as mean±s.d. Statistical significance was assessed by one-way ANOVA analysis to compare the results between different groups. \*\*  $p < 0.01$ .
